# Supplementary material for: Theoretical insights into TM@PHEs as single-atom catalysts for water splitting based on density functional theory
Source: Royal Society of Chemistry journal article supplement (doi:10.1039/d1cp03340a), 2021-12-01
Supplement: d1cp03340a1.pdf [file d1cp03340a1.pdf]

Supporting information:

## Theoretical insights into TM@PHEs as single-atom catalysts for water splitting based on density functional theory

Yongzhen Jiang, Wenxu Zou, Yadong Li and Yingxiang Cai\*

*Department of Physics, Nanchang University, Jiangxi, Nanchang 330031, P.R. China*

E-mail: [yingxiangcai@ncu.edu.cn](mailto:yingxiangcai@ncu.edu.cn)

The structures (cif format) of single-atom catalysts:

### 1. Au@PHE

```
#-----  
# CRYSTAL DATA  
#-----  
  
data_VESTA_phase_1  
  
_pd_phase_name          '?'  
_cell_length_a          5.70356  
_cell_length_b          5.70356  
_cell_length_c          30.35972  
_cell_angle_alpha       90  
_cell_angle_beta        90  
_cell_angle_gamma       120  
_symmetry_space_group_name_H-M  'P 1'  
_symmetry_Int_Tables_number 1  
  
loop_  
_symmetry_equiv_pos_as_xyz  
  'x, y, z'  
  
loop_  
  _atom_site_label  
  _atom_site_occupancy  
  _atom_site_fract_x  
  _atom_site_fract_y  
  _atom_site_fract_z  
  _atom_site_adp_type  
  _atom_site_B_iso_or_equiv  
  _atom_site_type_symbol  
C1      1.0    0.666667    0.333333    0.515980    Biso  1.000000 C  
C2      1.0    0.327866    0.408914    0.498798    Biso  1.000000 C  
C3      1.0    0.591086    0.918951    0.498798    Biso  1.000000 C  
C4      1.0    0.081048    0.672134    0.498798    Biso  1.000000 C  
C5      1.0    0.081049    0.408913    0.498798    Biso  1.000000 C  
C6      1.0    0.591087    0.672135    0.498798    Biso  1.000000 C  
C7      1.0    0.327866    0.918950    0.498798    Biso  1.000000 C  
C8      1.0    0.384632    0.192316    0.505011    Biso  1.000000 C  
C9      1.0    0.807684    0.192315    0.505011    Biso  1.000000 C  
C10     1.0    0.807685    0.615368    0.505011    Biso  1.000000 C  
Au1     1.0    0.666667    0.333333    0.586196    Biso  1.000000 Au
```

## 2. Co@PHE

#=====

# CRYSTAL DATA

#-----

data\_VESTA\_phase\_1

\_pd\_phase\_name                   '?'  
\_cell\_length\_a                   5.78812  
\_cell\_length\_b                   5.78812  
\_cell\_length\_c                   29.47958  
\_cell\_angle\_alpha                90  
\_cell\_angle\_beta                 90  
\_cell\_angle\_gamma                120  
\_symmetry\_space\_group\_name\_H-M   'P 1'  
\_symmetry\_Int\_Tables\_number      1

loop\_

\_symmetry\_equiv\_pos\_as\_xyz  
'x, y, z'

loop\_

| _atom_site_label | _atom_site_occupancy | _atom_site_fract_x | _atom_site_fract_y | _atom_site_fract_z | _atom_site_adp_type | _atom_site_B_iso_or_equiv | _atom_site_type_symbol |
|------------------|----------------------|--------------------|--------------------|--------------------|---------------------|---------------------------|------------------------|
| C1               | 1.0                  | 0.666764           | 0.333236           | 0.502281           | Biso                | 1.000000                  | C                      |
| C2               | 1.0                  | 0.327373           | 0.408581           | 0.501373           | Biso                | 1.000000                  | C                      |
| C3               | 1.0                  | 0.591456           | 0.918528           | 0.501369           | Biso                | 1.000000                  | C                      |
| C4               | 1.0                  | 0.081465           | 0.672644           | 0.501370           | Biso                | 1.000000                  | C                      |
| C5               | 1.0                  | 0.081472           | 0.408543           | 0.501369           | Biso                | 1.000000                  | C                      |
| C6               | 1.0                  | 0.591420           | 0.672629           | 0.501373           | Biso                | 1.000000                  | C                      |
| C7               | 1.0                  | 0.327355           | 0.918534           | 0.501370           | Biso                | 1.000000                  | C                      |
| C8               | 1.0                  | 0.390147           | 0.194947           | 0.502194           | Biso                | 1.000000                  | C                      |
| C9               | 1.0                  | 0.805081           | 0.194918           | 0.502190           | Biso                | 1.000000                  | C                      |
| C10              | 1.0                  | 0.805053           | 0.609854           | 0.502194           | Biso                | 1.000000                  | C                      |
| Co1              | 1.0                  | 0.333420           | 0.666580           | 0.552917           | Biso                | 1.000000                  | Co                     |

### 3. Cu@PHE

#-----

# CRYSTAL DATA

#-----

data\_VESTA\_phase\_1

\_pd\_phase\_name                   '?'  
\_cell\_length\_a                   5.64145  
\_cell\_length\_b                   5.64145  
\_cell\_length\_c                   31.03191  
\_cell\_angle\_alpha                90  
\_cell\_angle\_beta                 90  
\_cell\_angle\_gamma                120  
\_symmetry\_space\_group\_name\_H-M   'P 1'  
\_symmetry\_Int\_Tables\_number      1

loop\_

\_symmetry\_equiv\_pos\_as\_xyz  
  ' x, y, z'

loop\_

\_atom\_site\_label  
\_atom\_site\_occupancy  
\_atom\_site\_fract\_x  
\_atom\_site\_fract\_y  
\_atom\_site\_fract\_z  
\_atom\_site\_adp\_type  
\_atom\_site\_B\_iso\_or\_equiv  
\_atom\_site\_type\_symbol  
C1           1.0    0.666667    0.333333    0.520035    Biso  1.000000 C  
C2           1.0    0.331586    0.413391    0.495652    Biso  1.000000 C  
C3           1.0    0.586608    0.918194    0.495652    Biso  1.000000 C  
C4           1.0    0.081806    0.668414    0.495652    Biso  1.000000 C  
C5           1.0    0.081806    0.413391    0.495652    Biso  1.000000 C  
C6           1.0    0.586610    0.668415    0.495652    Biso  1.000000 C  
C7           1.0    0.331585    0.918193    0.495652    Biso  1.000000 C  
C8           1.0    0.380948    0.190473    0.510019    Biso  1.000000 C  
C9           1.0    0.809526    0.190473    0.510019    Biso  1.000000 C  
C10          1.0    0.809527    0.619053    0.510019    Biso  1.000000 C  
Cu1          1.0    0.000000    0.000000    0.545996    Biso  1.000000 Cu

#### 4. Fe@PHE

```
#-----  
# CRYSTAL DATA  
#-----  
  
data_VESTA_phase_1  
  
_pd_phase_name          '?'  
_cell_length_a          5.65186  
_cell_length_b          5.65186  
_cell_length_c          30.91773  
_cell_angle_alpha       90  
_cell_angle_beta        90  
_cell_angle_gamma       120  
_symmetry_space_group_name_H-M  'P 1'  
_symmetry_Int_Tables_number 1  
  
loop_  
_symmetry_equiv_pos_as_xyz  
  'x, y, z'  
  
loop_  
  _atom_site_label  
  _atom_site_occupancy  
  _atom_site_fract_x  
  _atom_site_fract_y  
  _atom_site_fract_z  
  _atom_site_adp_type  
  _atom_site_B_iso_or_equiv  
  _atom_site_type_symbol  
C1      1.0    0.666667    0.333333    0.520380    Biso  1.000000 C  
C2      1.0    0.331266    0.413274    0.495610    Biso  1.000000 C  
C3      1.0    0.586726    0.917991    0.495610    Biso  1.000000 C  
C4      1.0    0.082008    0.668734    0.495610    Biso  1.000000 C  
C5      1.0    0.082009    0.413273    0.495610    Biso  1.000000 C  
C6      1.0    0.586727    0.668735    0.495610    Biso  1.000000 C  
C7      1.0    0.331266    0.917990    0.495610    Biso  1.000000 C  
C8      1.0    0.381009    0.190504    0.510401    Biso  1.000000 C  
C9      1.0    0.809496    0.190503    0.510401    Biso  1.000000 C  
C10     1.0    0.809496    0.618992    0.510401    Biso  1.000000 C  
Fe1     1.0    0.000000    0.000000    0.544760    Biso  1.000000 Fe
```

## 5. Ni@PHE

#=====

# CRYSTAL DATA

#-----

data\_VESTA\_phase\_1

\_pd\_phase\_name ' ?  
\_cell\_length\_a 5.58347  
\_cell\_length\_b 5.58347  
\_cell\_length\_c 31.67977  
\_cell\_angle\_alpha 90  
\_cell\_angle\_beta 90  
\_cell\_angle\_gamma 120  
\_symmetry\_space\_group\_name\_H-M ' P 1 '  
\_symmetry\_Int\_Tables\_number 1

loop\_

\_symmetry\_equiv\_pos\_as\_xyz  
' x, y, z '

loop\_

\_atom\_site\_label  
\_atom\_site\_occupancy  
\_atom\_site\_fract\_x  
\_atom\_site\_fract\_y  
\_atom\_site\_fract\_z  
\_atom\_site\_adp\_type  
\_atom\_site\_B\_iso\_or\_equiv  
\_atom\_site\_type\_symbol  
C1 1.0 0.666667 0.333333 0.522930 Biso 1.000000 C  
C2 1.0 0.331962 0.412550 0.494786 Biso 1.000000 C  
C3 1.0 0.587450 0.919411 0.494786 Biso 1.000000 C  
C4 1.0 0.080589 0.668038 0.494786 Biso 1.000000 C  
C5 1.0 0.080589 0.412549 0.494786 Biso 1.000000 C  
C6 1.0 0.587451 0.668039 0.494786 Biso 1.000000 C  
C7 1.0 0.331961 0.919410 0.494786 Biso 1.000000 C  
C8 1.0 0.375588 0.187794 0.511355 Biso 1.000000 C  
C9 1.0 0.812206 0.187793 0.511355 Biso 1.000000 C  
C10 1.0 0.812207 0.624412 0.511355 Biso 1.000000 C  
Ni1 1.0 0.000000 0.000000 0.544289 Biso 1.000000 Ni

## 6. Pd@PHE

#=====

# CRYSTAL DATA

#-----

data\_VESTA\_phase\_1

\_pd\_phase\_name                   ' ?'  
\_cell\_length\_a                   5.59074  
\_cell\_length\_b                   5.59074  
\_cell\_length\_c                   31.59735  
\_cell\_angle\_alpha                90  
\_cell\_angle\_beta                 90  
\_cell\_angle\_gamma                120  
\_symmetry\_space\_group\_name\_H-M   ' P 1 '  
\_symmetry\_Int\_Tables\_number      1

loop\_

\_symmetry\_equiv\_pos\_as\_xyz  
  ' x, y, z '

loop\_

\_atom\_site\_label  
\_atom\_site\_occupancy  
\_atom\_site\_fract\_x  
\_atom\_site\_fract\_y  
\_atom\_site\_fract\_z  
\_atom\_site\_adp\_type  
\_atom\_site\_B\_iso\_or\_equiv  
\_atom\_site\_type\_symbol

|     |     |          |          |          |      |          |    |
|-----|-----|----------|----------|----------|------|----------|----|
| C1  | 1.0 | 0.666667 | 0.333333 | 0.522224 | Biso | 1.000000 | C  |
| C2  | 1.0 | 0.332331 | 0.413069 | 0.494041 | Biso | 1.000000 | C  |
| C3  | 1.0 | 0.586931 | 0.919260 | 0.494041 | Biso | 1.000000 | C  |
| C4  | 1.0 | 0.080739 | 0.667670 | 0.494041 | Biso | 1.000000 | C  |
| C5  | 1.0 | 0.080740 | 0.413068 | 0.494041 | Biso | 1.000000 | C  |
| C6  | 1.0 | 0.586932 | 0.667671 | 0.494041 | Biso | 1.000000 | C  |
| C7  | 1.0 | 0.332330 | 0.919259 | 0.494041 | Biso | 1.000000 | C  |
| C8  | 1.0 | 0.377326 | 0.188662 | 0.510571 | Biso | 1.000000 | C  |
| C9  | 1.0 | 0.811337 | 0.188662 | 0.510571 | Biso | 1.000000 | C  |
| C10 | 1.0 | 0.811338 | 0.622674 | 0.510571 | Biso | 1.000000 | C  |
| Pd1 | 1.0 | 0.000000 | 0.000000 | 0.551819 | Biso | 1.000000 | Pd |

## 7. Pt@PHE

#=====

# CRYSTAL DATA

#-----

data\_VESTA\_phase\_1

\_pd\_phase\_name                   ' ?'  
\_cell\_length\_a                   5.55388  
\_cell\_length\_b                   5.55388  
\_cell\_length\_c                   32.01822  
\_cell\_angle\_alpha                90  
\_cell\_angle\_beta                 90  
\_cell\_angle\_gamma                120  
\_symmetry\_space\_group\_name\_H-M   ' P 1'  
\_symmetry\_Int\_Tables\_number      1

loop\_

\_symmetry\_equiv\_pos\_as\_xyz  
  ' x, y, z'

loop\_

\_atom\_site\_label  
\_atom\_site\_occupancy  
\_atom\_site\_fract\_x  
\_atom\_site\_fract\_y  
\_atom\_site\_fract\_z  
\_atom\_site\_adp\_type  
\_atom\_site\_B\_iso\_or\_equiv  
\_atom\_site\_type\_symbol

|     |     |          |          |          |      |          |    |
|-----|-----|----------|----------|----------|------|----------|----|
| C1  | 1.0 | 0.666667 | 0.333333 | 0.523773 | Biso | 1.000000 | C  |
| C2  | 1.0 | 0.332568 | 0.412619 | 0.493361 | Biso | 1.000000 | C  |
| C3  | 1.0 | 0.587381 | 0.919948 | 0.493361 | Biso | 1.000000 | C  |
| C4  | 1.0 | 0.080051 | 0.667432 | 0.493361 | Biso | 1.000000 | C  |
| C5  | 1.0 | 0.080052 | 0.412618 | 0.493361 | Biso | 1.000000 | C  |
| C6  | 1.0 | 0.587382 | 0.667433 | 0.493361 | Biso | 1.000000 | C  |
| C7  | 1.0 | 0.332567 | 0.919947 | 0.493361 | Biso | 1.000000 | C  |
| C8  | 1.0 | 0.372892 | 0.186445 | 0.511565 | Biso | 1.000000 | C  |
| C9  | 1.0 | 0.813554 | 0.186445 | 0.511565 | Biso | 1.000000 | C  |
| C10 | 1.0 | 0.813555 | 0.627109 | 0.511565 | Biso | 1.000000 | C  |
| Pt1 | 1.0 | 0.000000 | 0.000000 | 0.551365 | Biso | 1.000000 | Pt |



## 8. Ru@PHE

#=====

# CRYSTAL DATA

#-----

data\_VESTA\_phase\_1

\_pd\_phase\_name                   ' ?'  
\_cell\_length\_a                   5.78788  
\_cell\_length\_b                   5.78788  
\_cell\_length\_c                   29.48211  
\_cell\_angle\_alpha                90  
\_cell\_angle\_beta                 90  
\_cell\_angle\_gamma                120  
\_symmetry\_space\_group\_name\_H-M   ' P 1'  
\_symmetry\_Int\_Tables\_number      1

loop\_

\_symmetry\_equiv\_pos\_as\_xyz  
  ' x, y, z'

loop\_

\_atom\_site\_label  
\_atom\_site\_occupancy  
\_atom\_site\_fract\_x  
\_atom\_site\_fract\_y  
\_atom\_site\_fract\_z  
\_atom\_site\_adp\_type  
\_atom\_site\_B\_iso\_or\_equiv  
\_atom\_site\_type\_symbol  
C1       1.0    0.666764    0.333236    0.503415    Biso  1.000000 C  
C2       1.0    0.328045    0.409021    0.500464    Biso  1.000000 C  
C3       1.0    0.591017    0.918760    0.500459    Biso  1.000000 C  
C4       1.0    0.081232    0.671972    0.500460    Biso  1.000000 C  
C5       1.0    0.081240    0.408983    0.500459    Biso  1.000000 C  
C6       1.0    0.590980    0.671957    0.500464    Biso  1.000000 C  
C7       1.0    0.328027    0.918767    0.500460    Biso  1.000000 C  
C8       1.0    0.389879    0.194813    0.502479    Biso  1.000000 C  
C9       1.0    0.805215    0.194785    0.502476    Biso  1.000000 C  
C10      1.0    0.805187    0.610121    0.502479    Biso  1.000000 C  
Ru1      1.0    0.333420    0.666580    0.556385    Biso  1.000000 Ru

## 9. Sc@PHE

#=====

# CRYSTAL DATA

#-----

data\_VESTA\_phase\_1

\_pd\_phase\_name                   ' ?'  
\_cell\_length\_a                   5.67311  
\_cell\_length\_b                   5.67311  
\_cell\_length\_c                   30.68644  
\_cell\_angle\_alpha                90  
\_cell\_angle\_beta                 90  
\_cell\_angle\_gamma                120  
\_symmetry\_space\_group\_name\_H-M   ' P 1'  
\_symmetry\_Int\_Tables\_number      1

loop\_

\_symmetry\_equiv\_pos\_as\_xyz  
  ' x, y, z'

loop\_

\_atom\_site\_label  
\_atom\_site\_occupancy  
\_atom\_site\_fract\_x  
\_atom\_site\_fract\_y  
\_atom\_site\_fract\_z  
\_atom\_site\_adp\_type  
\_atom\_site\_B\_iso\_or\_equiv  
\_atom\_site\_type\_symbol  
C1       1.0    0.666667    0.333333    0.487873    Biso  1.000000 C  
C2       1.0    0.330763    0.409665    0.510983    Biso  1.000000 C  
C3       1.0    0.590335    0.921097    0.510983    Biso  1.000000 C  
C4       1.0    0.078903    0.669238    0.510983    Biso  1.000000 C  
C5       1.0    0.078903    0.409664    0.510983    Biso  1.000000 C  
C6       1.0    0.590336    0.669239    0.510983    Biso  1.000000 C  
C7       1.0    0.330762    0.921096    0.510983    Biso  1.000000 C  
C8       1.0    0.386766    0.193382    0.499326    Biso  1.000000 C  
C9       1.0    0.806617    0.193382    0.499326    Biso  1.000000 C  
C10      1.0    0.806618    0.613235    0.499326    Biso  1.000000 C  
Sc1      1.0    0.666667    0.333333    0.558250    Biso  1.000000 Sc

## 10. Ti@PHE

#=====

# CRYSTAL DATA

#-----

data\_VESTA\_phase\_1

\_pd\_phase\_name                   '?'  
\_cell\_length\_a                   5.66409  
\_cell\_length\_b                   5.66409  
\_cell\_length\_c                   30.78429  
\_cell\_angle\_alpha                90  
\_cell\_angle\_beta                 90  
\_cell\_angle\_gamma                120  
\_symmetry\_space\_group\_name\_H-M   'P 1'  
\_symmetry\_Int\_Tables\_number      1

loop\_

\_symmetry\_equiv\_pos\_as\_xyz  
  'x, y, z'

loop\_

\_atom\_site\_label  
\_atom\_site\_occupancy  
\_atom\_site\_fract\_x  
\_atom\_site\_fract\_y  
\_atom\_site\_fract\_z  
\_atom\_site\_adp\_type  
\_atom\_site\_B\_iso\_or\_equiv  
\_atom\_site\_type\_symbol  
C1       1.0    0.666667    0.333333    0.486565    Biso  1.000000 C  
C2       1.0    0.330648    0.409045    0.511825    Biso  1.000000 C  
C3       1.0    0.590955    0.921603    0.511825    Biso  1.000000 C  
C4       1.0    0.078397    0.669352    0.511825    Biso  1.000000 C  
C5       1.0    0.078397    0.409044    0.511825    Biso  1.000000 C  
C6       1.0    0.590956    0.669353    0.511825    Biso  1.000000 C  
C7       1.0    0.330648    0.921602    0.511825    Biso  1.000000 C  
C8       1.0    0.387209    0.193604    0.499227    Biso  1.000000 C  
C9       1.0    0.806396    0.193604    0.499227    Biso  1.000000 C  
C10      1.0    0.806396    0.612791    0.499227    Biso  1.000000 C  
Ti1      1.0    0.666667    0.333333    0.554802    Biso  1.000000 Ti

## 11. V@PHE

#=====

# CRYSTAL DATA

#-----

data\_VESTA\_phase\_1

\_pd\_phase\_name 'P2\_1' ,  
\_cell\_length\_a 5.69679  
\_cell\_length\_b 5.69679  
\_cell\_length\_c 30.43194  
\_cell\_angle\_alpha 90  
\_cell\_angle\_beta 90  
\_cell\_angle\_gamma 120  
\_symmetry\_space\_group\_name\_H-M 'P 1'  
\_symmetry\_Int\_Tables\_number 1

loop\_

\_symmetry\_equiv\_pos\_as\_xyz  
'x, y, z'

loop\_

| _atom_site_label | _atom_site_occupancy | _atom_site_fract_x | _atom_site_fract_y | _atom_site_fract_z | _atom_site_adp_type | _atom_site_B_iso_or_equiv | _atom_site_type_symbol |
|------------------|----------------------|--------------------|--------------------|--------------------|---------------------|---------------------------|------------------------|
| C1               | 1.0                  | 0.666667           | 0.333333           | 0.488238           | Biso                | 1.000000                  | C                      |
| C2               | 1.0                  | 0.329430           | 0.410434           | 0.510708           | Biso                | 1.000000                  | C                      |
| C3               | 1.0                  | 0.589566           | 0.918994           | 0.510708           | Biso                | 1.000000                  | C                      |
| C4               | 1.0                  | 0.081005           | 0.670571           | 0.510708           | Biso                | 1.000000                  | C                      |
| C5               | 1.0                  | 0.081006           | 0.410433           | 0.510708           | Biso                | 1.000000                  | C                      |
| C6               | 1.0                  | 0.589567           | 0.670572           | 0.510708           | Biso                | 1.000000                  | C                      |
| C7               | 1.0                  | 0.329429           | 0.918994           | 0.510708           | Biso                | 1.000000                  | C                      |
| C8               | 1.0                  | 0.388588           | 0.194293           | 0.500551           | Biso                | 1.000000                  | C                      |
| C9               | 1.0                  | 0.805706           | 0.194293           | 0.500551           | Biso                | 1.000000                  | C                      |
| C10              | 1.0                  | 0.805707           | 0.611413           | 0.500551           | Biso                | 1.000000                  | C                      |
| V1               | 1.0                  | 0.666667           | 0.333333           | 0.555860           | Biso                | 1.000000                  | V                      |
